# Supplementary material for: Zinc-modulated Fe–Co Prussian blue analogues with well-controlled morphologies for the efficient sorption of cesium
Source: Royal Society of Chemistry journal article supplement (doi:10.1039/c6ta10016c), 2017-01-01
Supplement: c6ta10016c1.pdf [file c6ta10016c1.pdf]

## **Zinc-modulated Fe-Co Prussian blue analogues with well-controlled morphology for cesium adsorption**

Jiayi Liu,<sup>a,b</sup> Xuning Li,<sup>a,b</sup> Alexandre I. Rykov,<sup>a</sup> Qiaohui Fan,<sup>\*c</sup> Wei Xu,<sup>d</sup> Weimin Cong,<sup>e</sup>  
Changzi Jin,<sup>a</sup> Hailian Tang,<sup>a,b</sup> Kaixin Zhu,<sup>a,b</sup> Ayyakannu Sundaram Ganeshraja,<sup>a</sup> Rile Ge,<sup>a</sup>  
Xiaodong Wang,<sup>e</sup> and Junhu Wang<sup>\*a</sup>

<sup>a</sup>Mössbauer Effect Data Center, Dalian Institute of Chemical Physics, Chinese Academy of Sciences, Dalian 116023, China. \*E-mail: wangjh@dicp.ac.cn

<sup>b</sup>University of Chinese Academy of Sciences, Beijing 100049, China

<sup>c</sup>Key Laboratory of Petroleum Resources, Gansu Province / CAS Key Laboratory of Petroleum Resources Research, Institute of Geology and Geophysics, Chinese Academy of Sciences, Lanzhou 730000, China. \*E-mail: fanqh@lzb.ac.cn

<sup>d</sup>Beijing Synchrotron Radiation Facility, Institute of High Energy Physics, Chinese Academy of Sciences, Beijing 100049, China

<sup>e</sup>State Key Laboratory of Catalysis, Dalian Institute of Chemical Physics, Chinese Academy of Sciences

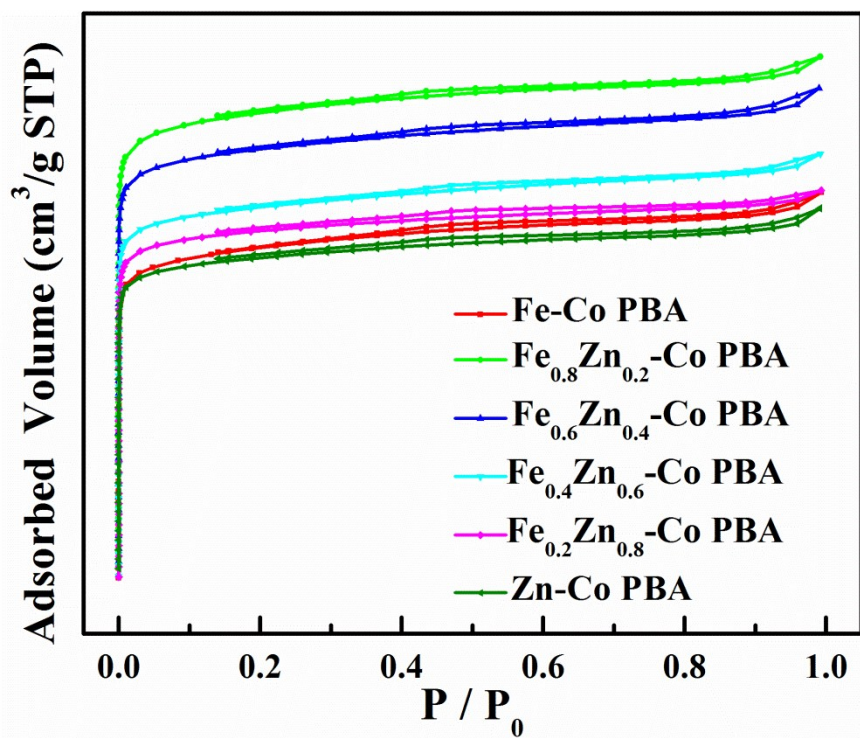

**Fig. S1** N<sub>2</sub> adsorption/desorption isotherm of Fe<sub>x</sub>Zn<sub>1-x</sub>-Co PBAs

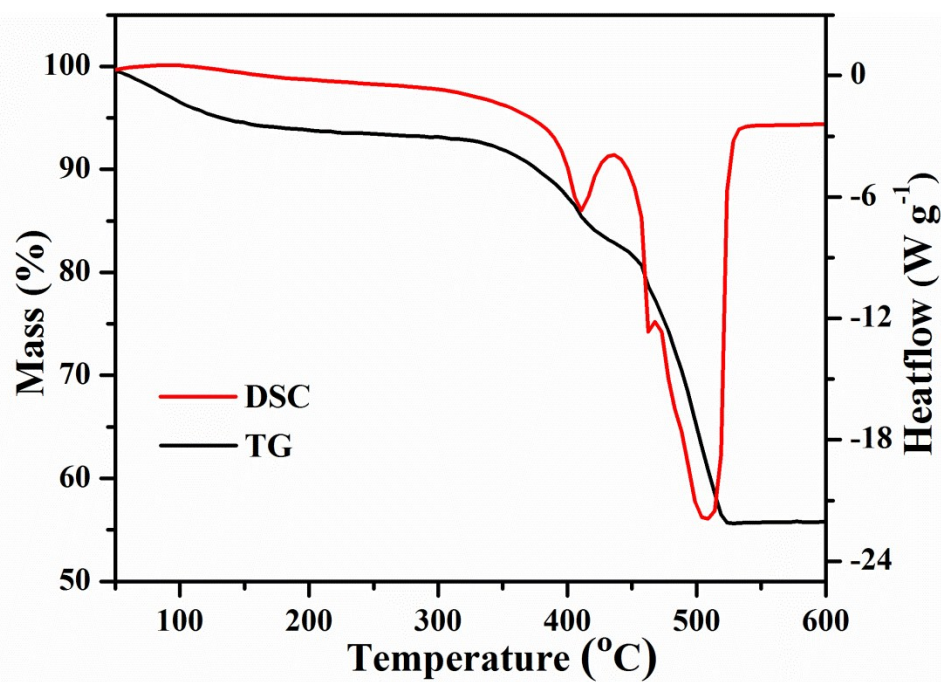

**Fig. S2** TG and DSC curves of Zn-Co PBA

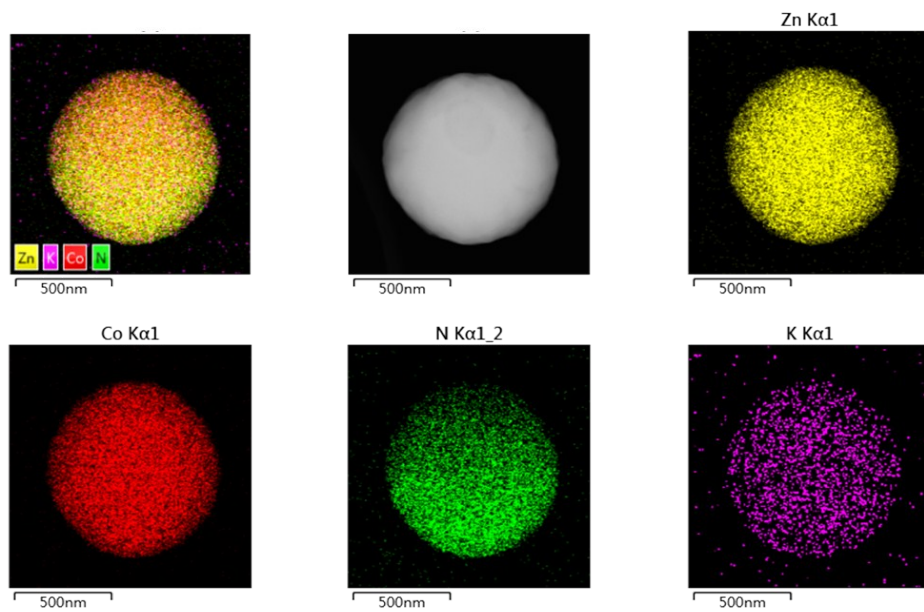

**Fig. S3** Elemental mappings of Zn-Co PBA

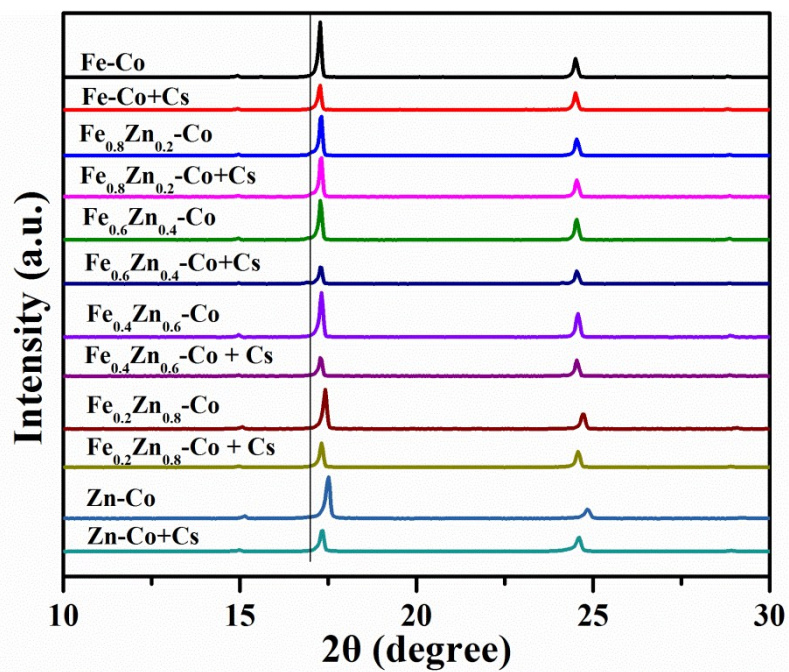

**Fig. S4** Comparison of XRD patterns of the series of  $\text{Fe}_x\text{Zn}_{1-x}$ -Co PBAs before and after adsorption

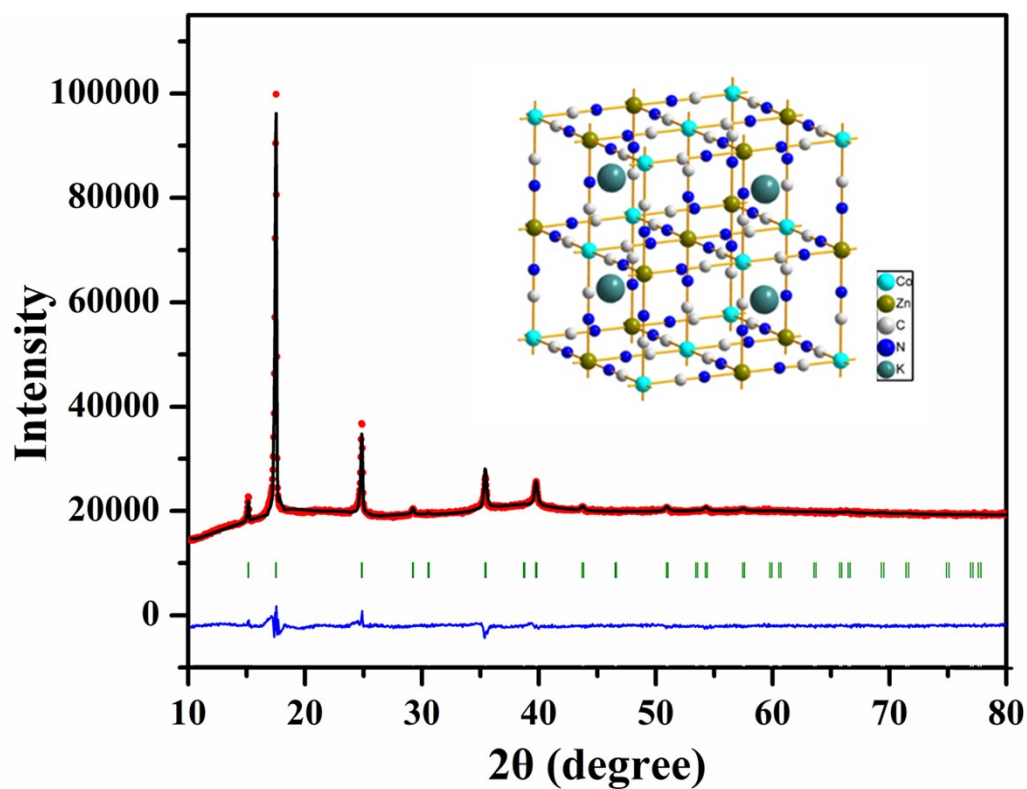

**Fig. S5** The Rietveld structural refinement result of Zn-Co PBA (XRD powder patterns observed in red, calculated in black and difference profile in blue;  $a = 10.137 \text{ \AA}$ , space group  $Fm-3m$ ,  $R_{wp} = 15.8\%$ ,  $R_{exp} = 7.93\%$ . Inset: Crystal structure model of Zn-Co PBA, the water molecules are omitted.)

**Table S1** BET surface area, pore size and micropore volume of the Fe<sub>x</sub>Zn<sub>1-x</sub>-Co PBAs

| material                                            | Fe-Co  | Fe <sub>0.8</sub> Zn <sub>0.2</sub> -Co | Fe <sub>0.6</sub> Zn <sub>0.4</sub> -Co | Fe <sub>0.4</sub> Zn <sub>0.6</sub> -Co | Fe <sub>0.2</sub> Zn <sub>0.8</sub> -Co | Zn-Co  |
|-----------------------------------------------------|--------|-----------------------------------------|-----------------------------------------|-----------------------------------------|-----------------------------------------|--------|
| BET(m <sup>2</sup> g <sup>-1</sup> )                | 569.49 | 754.65                                  | 697.19                                  | 604.25                                  | 549.64                                  | 507.71 |
| H-K median pore width (nm)                          | 0.6140 | 0.6139                                  | 0.6087                                  | 0.6106                                  | 0.6117                                  | 0.6096 |
| micropore volume (cm <sup>3</sup> g <sup>-1</sup> ) | 0.1867 | 0.2753                                  | 0.2554                                  | 0.2192                                  | 0.2089                                  | 0.1907 |

**Table S2** Isotherm parameters for the adsorption of Cs<sup>+</sup> using Zn-Co PBA

| Langmuir model              |                               |                | Freundlich model            |      |                |
|-----------------------------|-------------------------------|----------------|-----------------------------|------|----------------|
| $k_L$ (L mg <sup>-1</sup> ) | $Q_m$ (mmol g <sup>-1</sup> ) | R <sup>2</sup> | $K_F$ (L mg <sup>-1</sup> ) | n    | R <sup>2</sup> |
| 23.34                       | 1.92                          | 0.96           | 1.80                        | 5.26 | 0.87           |



**Table S3** pH of the solution before and after adsorption

| Adsorbent                               | pH of CsCl solution (0.001M) | pH after adsorption |
|-----------------------------------------|------------------------------|---------------------|
| Fe-Co                                   | 6.74                         | 5.28                |
| Fe <sub>0.8</sub> Zn <sub>0.2</sub> -Co |                              | 5.38                |
| Fe <sub>0.6</sub> Zn <sub>0.4</sub> -Co |                              | 5.57                |
| Fe <sub>0.4</sub> Zn <sub>0.6</sub> -Co |                              | 5.37                |
| Fe <sub>0.2</sub> Zn <sub>0.8</sub> -Co |                              | 5.26                |
| Zn-Co                                   |                              | 5.44                |

**Table S4** Fractional atomic coordinates and occupancies of Zn-Co PBA.

| Wyckoff | Atom           | x    | y    | z    | Occ  | U, Å <sup>2</sup> |
|---------|----------------|------|------|------|------|-------------------|
| 4a      | Co             | 0    | 0    | 0    | 0.47 | 0.035(12)         |
| 4b      | Zn             | 0.5  | 0.5  | 0.5  | 1    | 0.28(2)           |
| 8c      | O <sub>1</sub> | 0.25 | 0.25 | 0.25 | 0.45 | 0.45(18)          |
| 8c      | K              | 0.25 | 0.25 | 0.25 | 0.06 | 0.45(18)          |
| 24e     | C              | 0.19 | 0    | 0    | 0.47 | 0.4(8)            |
| 24e     | N              | 0.31 | 0    | 0    | 0.47 | 0.12(7)           |
| 24e     | O <sub>2</sub> | 0.21 | 0    | 0    | 0.52 | 0.24(13)          |

O<sub>1</sub>: crystal water, O<sub>2</sub>: coordinated water.

**Table S5** Room temperature  $^{57}\text{Fe}$  Mössbauer parameters of Fe-Co and  $\text{Fe}_{0.6}\text{Zn}_{0.4}\text{-Co}$  PBAs before and after sorption

| Sample                                              | Parameter                 | Fe(III) HS | Fe(II) HS |        |        |
|-----------------------------------------------------|---------------------------|------------|-----------|--------|--------|
|                                                     |                           |            | site 1    | site 2 | site 3 |
| Fe-Co (before)                                      | IS ( $\text{mm s}^{-1}$ ) | 0.33       | 1.11      | 1.11   | 1.13   |
|                                                     | QS ( $\text{mm s}^{-1}$ ) | 0.72       | 0.88      | 1.52   | 1.97   |
|                                                     | Area (%)                  | 26.4       | 19.9      | 30.9   | 22.8   |
| Fe-Co (after)                                       | IS ( $\text{mm s}^{-1}$ ) | 0.33       | 1.1       | 1.12   | 1.13   |
|                                                     | QS ( $\text{mm s}^{-1}$ ) | 1.05       | 0.92      | 1.53   | 2.08   |
|                                                     | Area (%)                  | 47.7       | 15.4      | 21.8   | 15.1   |
| $\text{Fe}_{0.6}\text{Zn}_{0.4}\text{-Co}$ (before) | IS ( $\text{mm s}^{-1}$ ) | 0.33       | 1.23      | 1.15   | 1.1    |
|                                                     | QS ( $\text{mm s}^{-1}$ ) | 0.72       | 0.6       | 1.21   | 1.89   |
|                                                     | Area (%)                  | 44         | 3.2       | 21.3   | 31.5   |
| $\text{Fe}_{0.6}\text{Zn}_{0.4}\text{-Co}$ (after)  | IS ( $\text{mm s}^{-1}$ ) | 0.33       | 1.23      | 1.15   | 1.1    |
|                                                     | QS ( $\text{mm s}^{-1}$ ) | 0.72       | 0.55      | 1.9    | 2.06   |
|                                                     | Area (%)                  | 60.5       | 6.1       | 18.2   | 15.2   |

**Table S6** Concentration of M<sup>A</sup> and M<sup>B</sup> released

| <b>M<sup>A</sup>-M<sup>B</sup> PBA</b> | <b>Co-Fe</b> | <b>Cu-Fe</b> | <b>Mn-Co</b> | <b>Ni-Co</b> |
|----------------------------------------|--------------|--------------|--------------|--------------|
| C <sub>M<sup>A</sup></sub> (ppm)       | 8.139        | 10.25        | 9.579        | 19.33        |
| C <sub>M<sup>B</sup></sub> (ppm)       | 0.0588       | 0.3731       | 1.868        | 0.9338       |

M<sup>A</sup>-M<sup>B</sup> PBA represents M<sup>A</sup><sub>3</sub>[M<sup>B</sup>(CN)<sub>6</sub>]<sub>2</sub>
